# Supplementary material for: circATP2A2 promotes osteosarcoma progression by upregulating MYH9
Source: publisher site journal article supplement (doi:10.1515/med-2021-0370), 2021-01-01
Supplement: Supplementary file 1 [file RT-qPCR-data-revised.xlsx]

## Sheet: 1B.csv
hFOB1.19	hFOB1.19	hFOB1.19	U2OS	U2OS	U2OS	HOS	HOS	HOS	Saos-2	Saos-2	Saos-2
1.012	0.935	1.053	2.262	2.121	2.337	1.706	1.603	1.761	2.424	2.141	2.575

## Sheet: 1C.csv
Adjacent tissues(n=51)	OS cancer tissues (n=51)
1.25	1.41
1.03	1.39
0.9	1.96
1.05	1.95
1.02	1.73
1.01	1.57
1.03	1.56
1.04	1.59
1.02	1.44
1.04	1.41
0.9	1.59
1.1	1.44
1	1.41
0.9	1.59
0.8	1.44
0.71	1.41
0.72	1.74
0.74	1.61
0.69	1.62
0.68	1.64
0.67	1.55
1.75	1.57
1.74	1.56
0.72	1.59
0.71	1.44
1.32	1.41
0.75	1.39
1.26	1.38
0.69	1.36
0.76	1.24
0.883	1.53
0.763	1.113
0.996	1.965
1.15	0.969
1.21	1.456
1.35	1.632
1.11	1.452
1.34	1.234
1.05	1.523
1.963	1.444
1.532	1.352
0.523	1.114
1.423	1.621
0.685	0.852
0.9632	0.9635
0.752	0.9875
1.777	1.324
0.635	1.241
0.432	1.6523
0.532	1.5232
1.423	1.542

## Sheet: 1F.csv
Healthy Serum (n=47)	OS cancer Serum (n=51)
0.684	0.989
0.756	1.654
0.832	1.3562
0.654	1.525
0.423	1.365
0.356	1.456
0.852	1.354
0.465	1.321
0.356	1.546
0.456	0.9623
0.485	0.8652
0.763	1.356
0.932	1.583
0.452	1.654
0.485	1.723
0.985	1.652
1.21	1.785
1.235	1.635
1.254	1.456
1.354	1.325
0.862	1.654
0.936	1.752
0.765	1.625
0.865	0.658
0.962	0.836
1.324	0.926
1.256	0.689
1.125	1.654
1.025	0.654
1.0265	1.685
1.0354	1.6325
1.025	1.654
1.0254	1.823
1.0354	1.7623
1.054	0.6985
1.124	0.965
1.325	1.235
1.423	1.5325
1.562	1.214
1.245	0.9632
1.63	0.8523
1.241	1.325
0.93	1.658
1.024	1.7262
1.324	0.8632
0.462	0.852
0.632	0.6541
	0.8632
	1.3652
	1.8632
	1.6254

## Sheet: 1H.csv
	Control	Control	Control	RNase R	RNase R	RNase R
circATP2A2	1.01	0.95	1.04	0.99	0.92	1
ATP2A2 mRNA	1.02	0.91	1.07	0.19	0.25	0.11

## Sheet: 1I.csv
	Control	Control	Control	RNase R	RNase R	RNase R
circATP2A2	1.06	1.06	0.88	1.03	0.95	0.9
ATP2A2 mRNA	1.05	1.03	0.92	0.26	0.22	0.18

## Sheet: 1J.csv
	Cytoplasm	Cytoplasm	Cytoplasm	Nucleus	Nucleus	Nucleus
circATP2A2	0.8	0.89	0.82	0.2	0.11	0.18
U6	0.06	0.1	0.08	0.94	0.9	0.92
GAPDH	0.9	0.86	0.93	0.1	0.14	0.07

## Sheet: 1K.csv
	Cytoplasm	Cytoplasm	Cytoplasm	Nucleus	Nucleus	Nucleus
circATP2A2	0.78	0.85	0.75	0.22	0.15	0.25
U6	0.07	0.09	0.1	0.93	0.91	0.9
GAPDH	0.85	0.88	0.94	0.15	0.12	0.06

## Sheet: 2A.csv
	sh-NC	sh-NC	sh-NC	sh-circATP2A2	sh-circATP2A2	sh-circATP2A2
U2OS	1.05	1.03	0.92	0.52	0.43	0.36
Saos-2	1.06	1.06	0.88	0.42	0.46	0.32

## Sheet: 3B.csv
	Oligo probe	Oligo probe	Oligo probe	circATP2A2 probe	circATP2A2 probe	circATP2A2 probe
miR-142-5p	1.02	0.88	1.1	1.21	1.16	1.53
miR-145-5p	1.01	0.95	1.04	2.3	1.9	1.58
miR-338-3p	0.96	0.94	1.09	0.85	0.83	1.02
miR-95-3p	0.97	0.96	1.07	1.4	1.6	1.2
miR-335-5p	1.02	0.91	1.07	5.3	6.3	6.7

## Sheet: 3B-1.csv
	Oligo probe	Oligo probe	Oligo probe	circATP2A2 probe	circATP2A2 probe	circATP2A2 probe
miR-142-5p	1.05	1.06	0.89	1.57	1.29	1.63
miR-145-5p	1.06	0.91	1.03	1.12	0.88	1.18
miR-338-3p	1.1	0.87	1.03	1.36	1.14	1.4
miR-95-3p	1.09	0.87	1.04	1.3	0.75	1
miR-335-5p	1.07	0.9	1.03	5.7	4.9	5.9

[truncated: 10 more sheets: 3D.csv, 3G.csv, 3H.csv, 3I.csv, 3J.csv, 5A.csv, 5H.csv, 5I.csv, 7C.csv, Sheet1]
